# Supplementary material
Source: publisher figshare collection journal article supplement (https://geolsoc.figshare.com/ndownloader/files/30895464)

**Fig. S4**

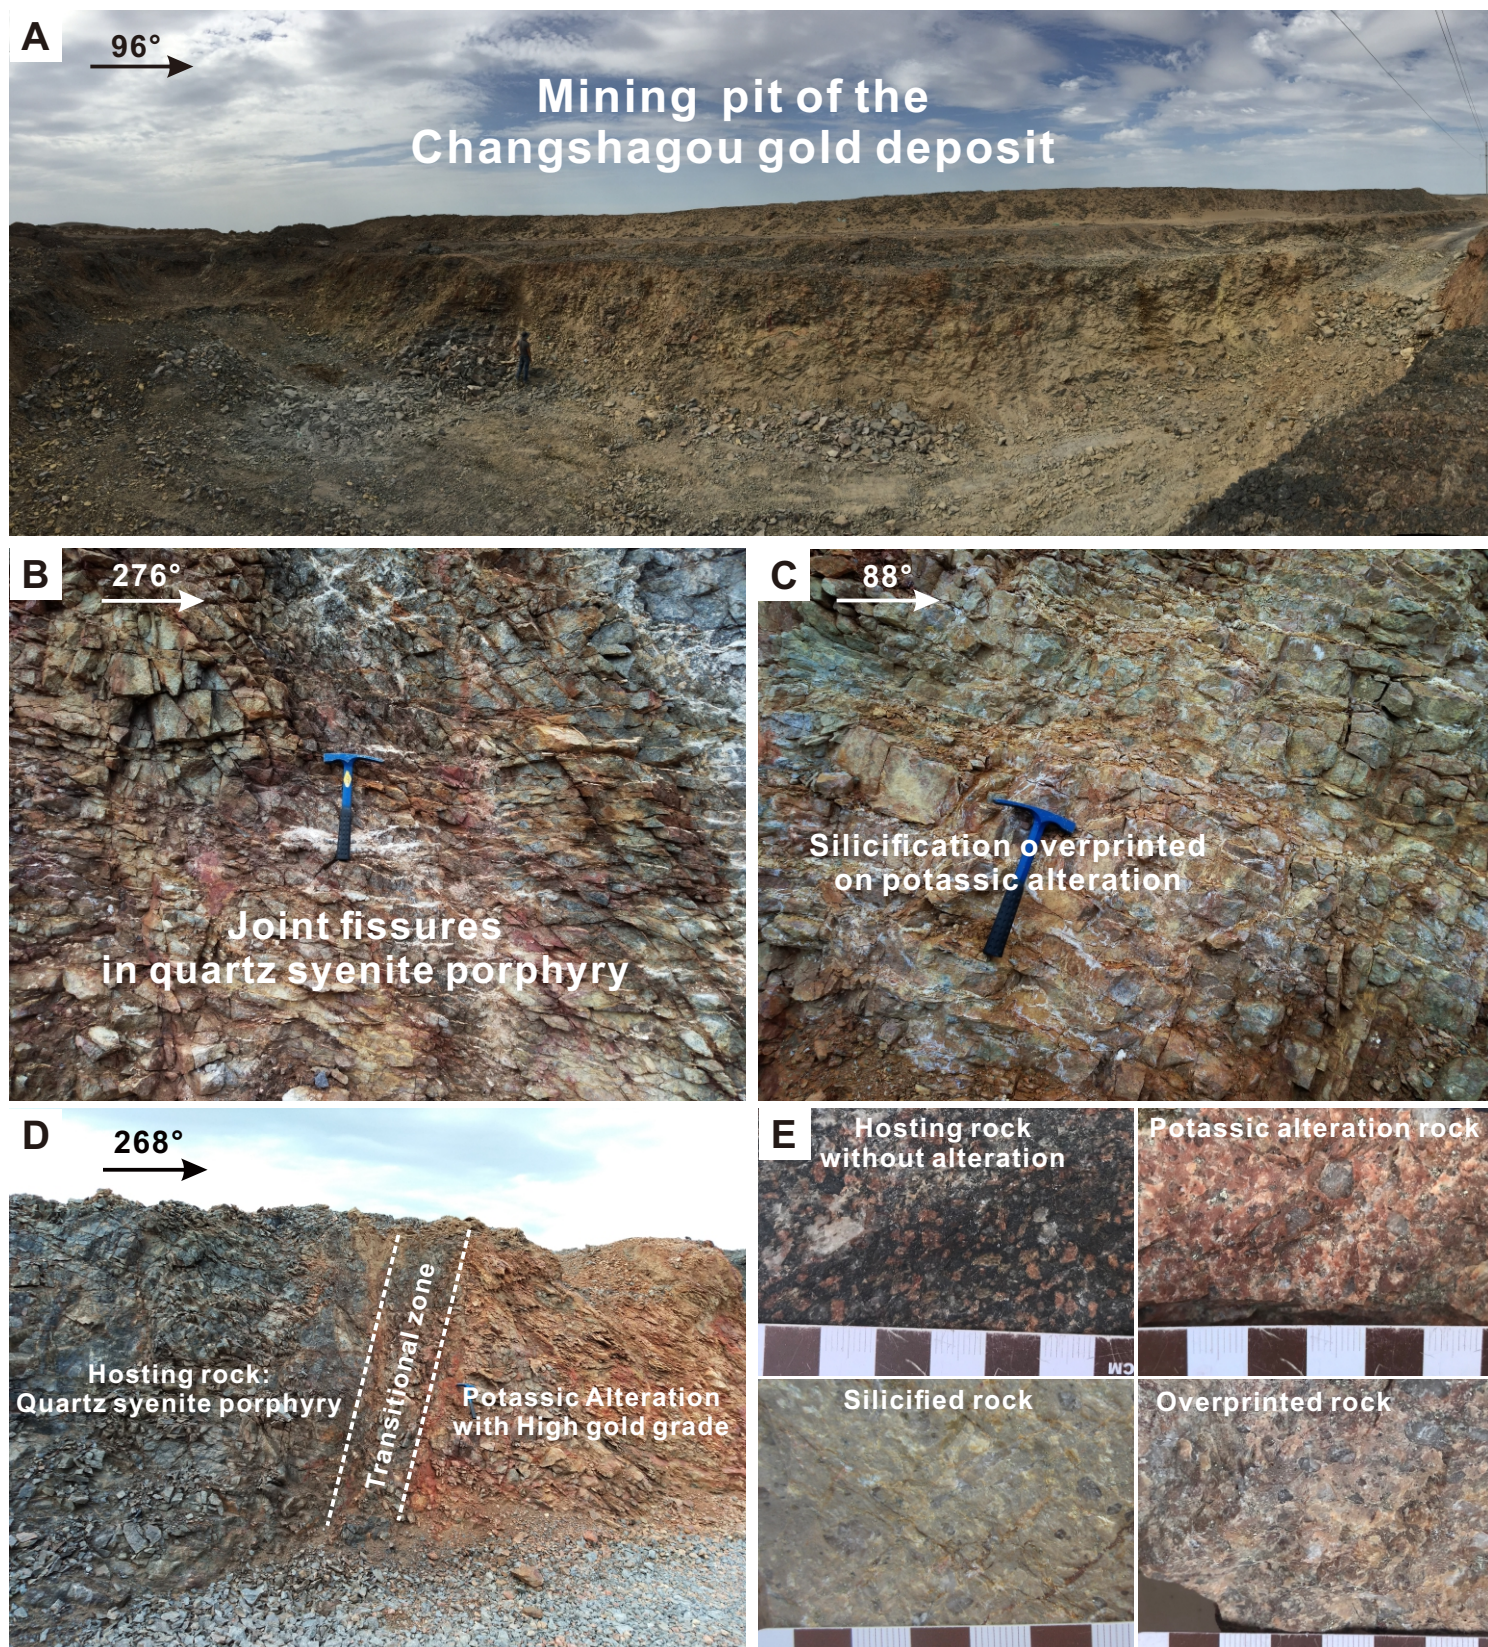

Supplement: Supplementary file 1 [file 30895464]
